# Supplementary material
Source: Springer Nature journal article supplement (https://www.springermedizin.de/resource/supplementary/12967_2006_166_MOESM7_ESM.pdf/9575974)

**A**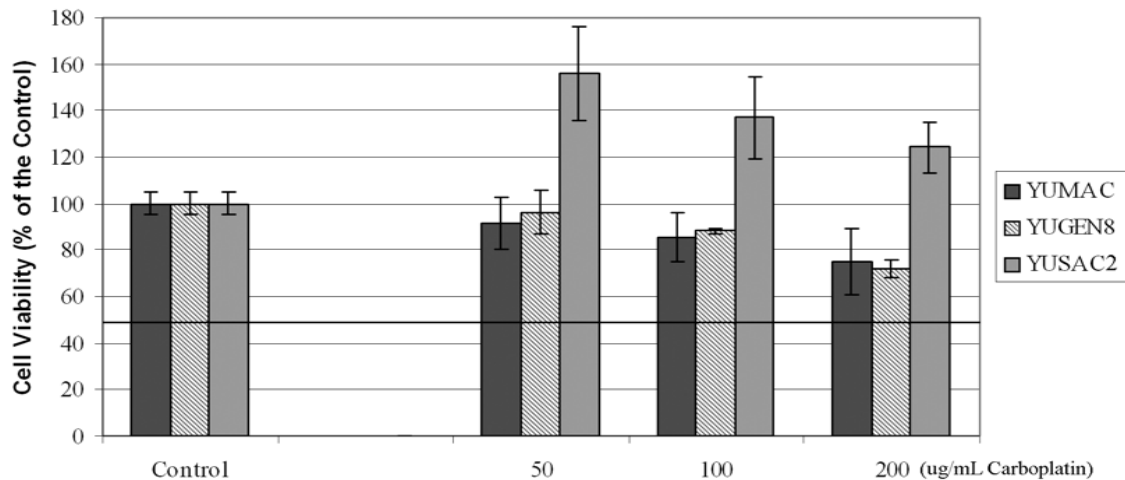**B**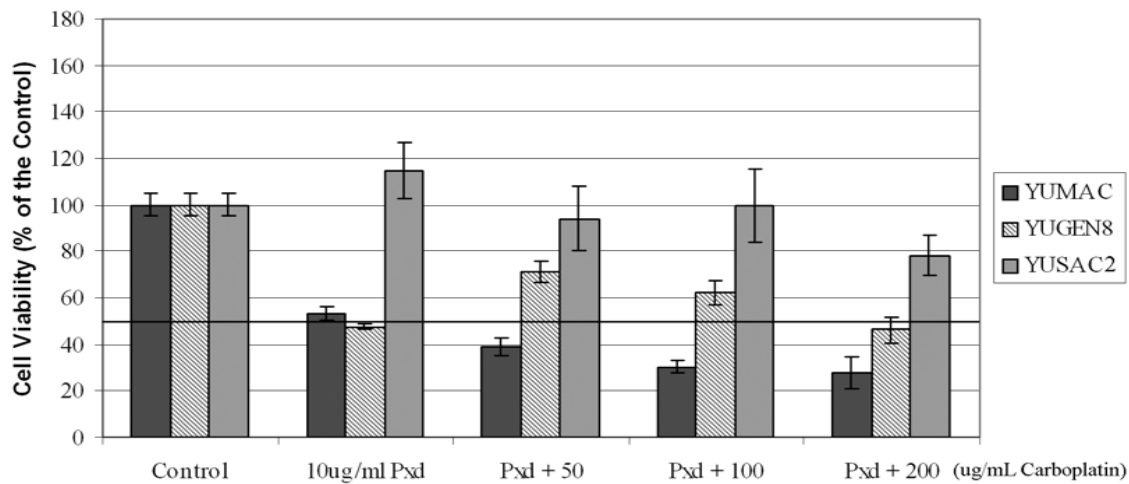

Supplement: MOESM7 [file 9575974]
